# Supplementary material for: Synthesis of megadalton stereoregular ring-substituted poly(phenylacetylene)s by a rhodium(i) catalyst with a N-functionalized hemilabile phosphine ligand
Source: Royal Society of Chemistry journal article supplement (doi:10.1039/d4py00259h), 2024-01-01
Supplement: d4py00259h1.pdf [file d4py00259h1.pdf]

## Supporting Information

### Synthesis of megadalton stereoregular ring-substituted poly(phenylacetylene)s by a rhodium(I) catalyst with a *N*-functionalized hemilabile phosphine ligand

Marta Angoy, M. Victoria Jiménez, Eugenio Vispe, and Jesús J. Pérez-Torrente.

*Departamento de Química Inorgánica, Instituto de Síntesis Química y Catálisis Homogénea–ISQCH, Universidad de Zaragoza–CSIC, Facultad de Ciencias, C/ Pedro Cerbuna, 12, 50009 Zaragoza, Spain.*

Email: perez@unizar.es

#### Contents

|                                                |     |
|------------------------------------------------|-----|
| 1.- NMR spectra of poly(phenylacetylene)s      | S2  |
| 2.- SEC-MALS chromatograms.                    | S12 |
| 3.- Kinetic data.                              | S15 |
| 4.- Selected DSC thermograms.                  | S21 |
| 5.- Thermal degradation of polymer <b>PPAe</b> | S23 |

## 1.- NMR spectra of poly(phenylacetylene)s.

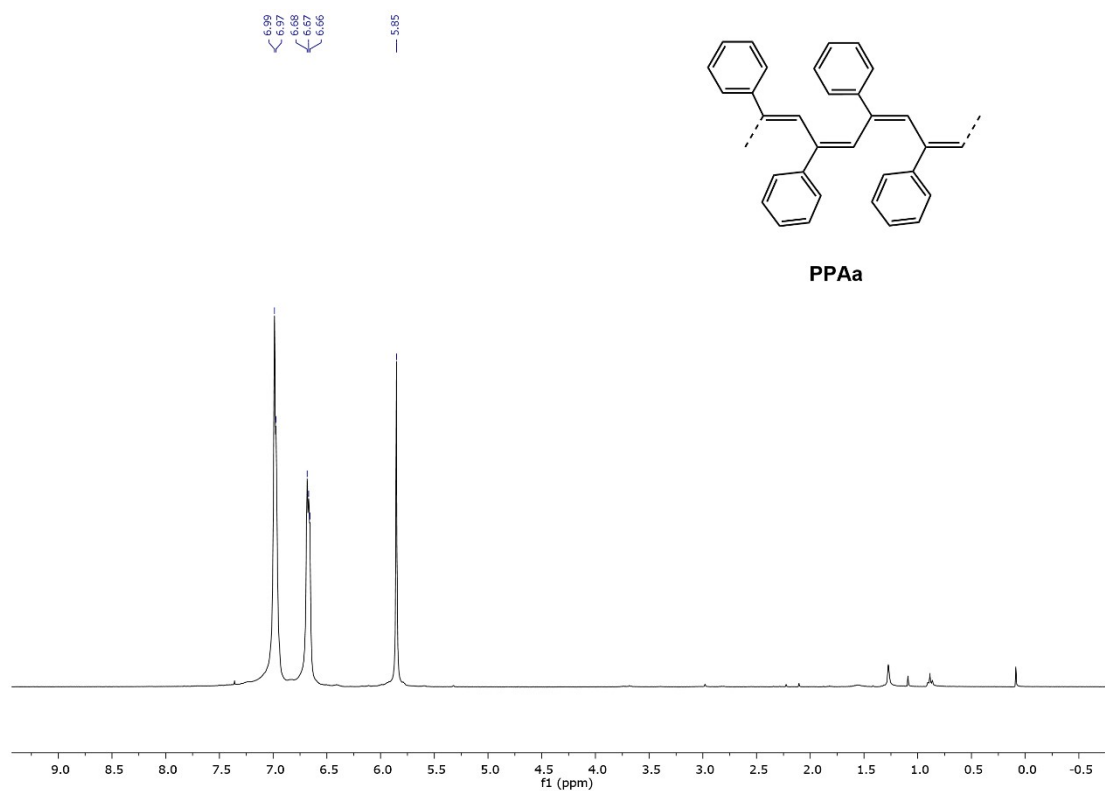

Figure S1.  $^1\text{H}$  NMR (300 MHz) spectrum of polymer **PPAa** in  $\text{CD}_2\text{Cl}_2$ .

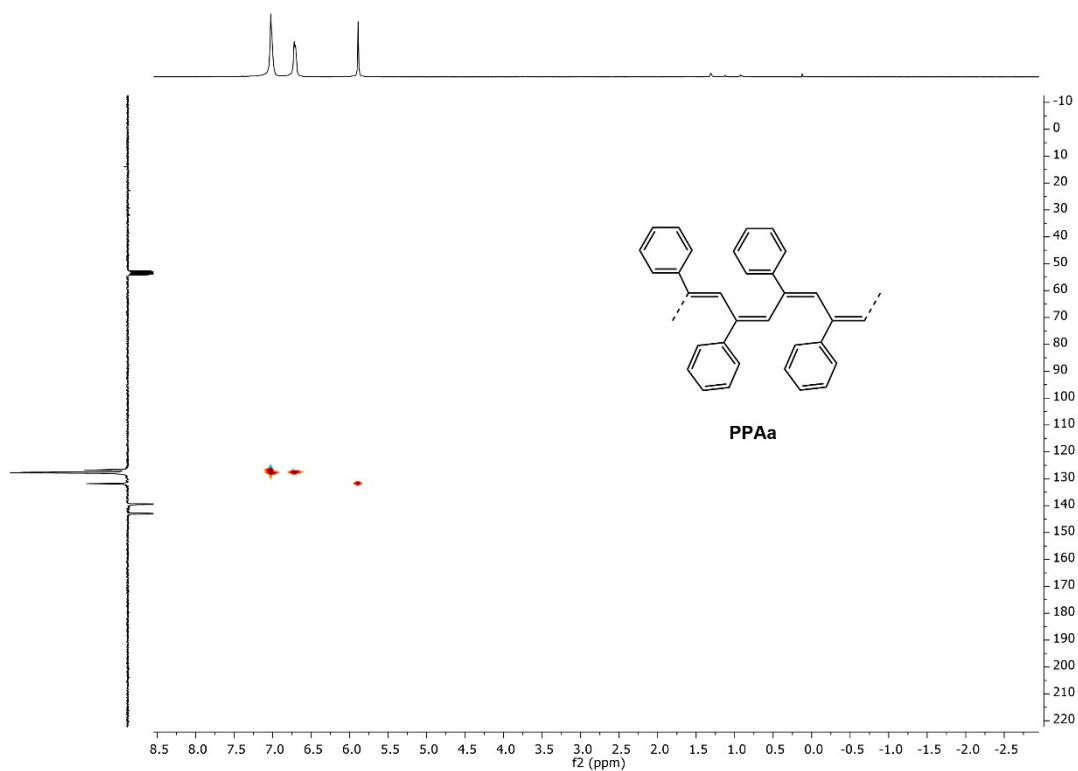

Figure S2.  $^1\text{H}$ - $^{13}\text{C}$ -HSQC (300 MHz) spectrum of polymer **PPAa** in  $\text{CD}_2\text{Cl}_2$ .

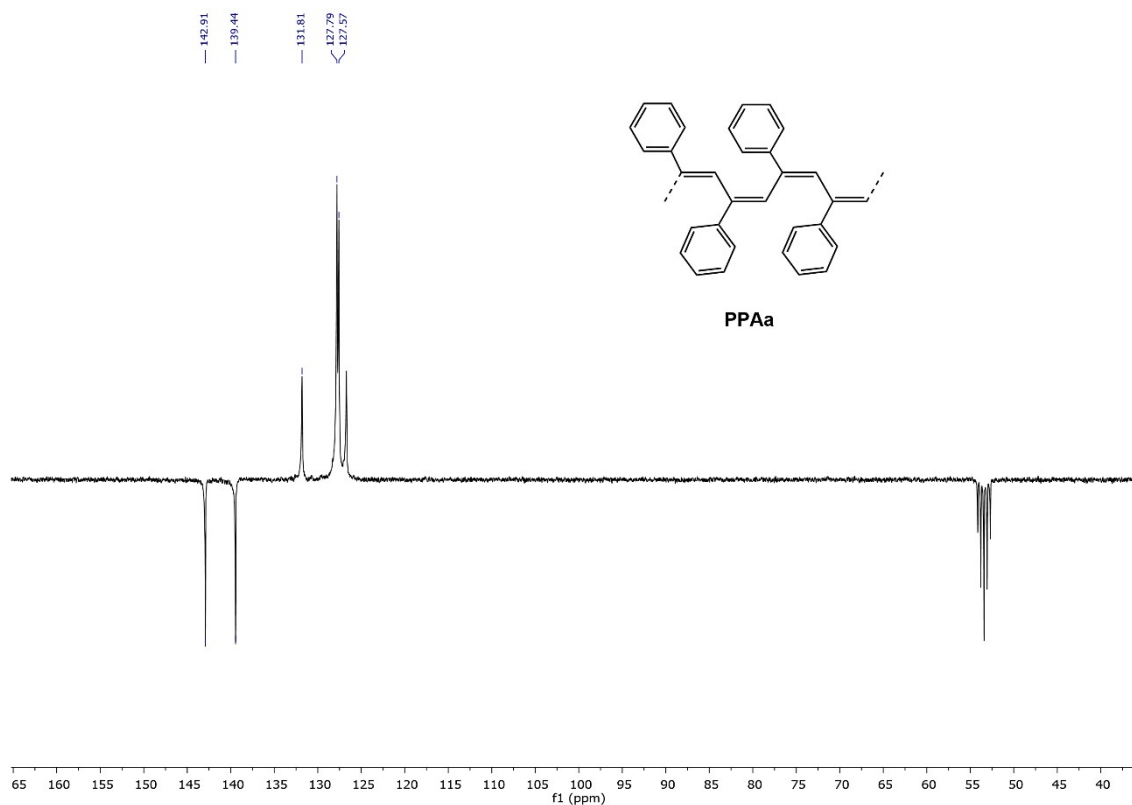

**Figure S3.**  $^{13}\text{C}\{^1\text{H}\}$ -APT NMR (300 MHz) spectrum of polymer **PPAa** in  $\text{CD}_2\text{Cl}_2$ .

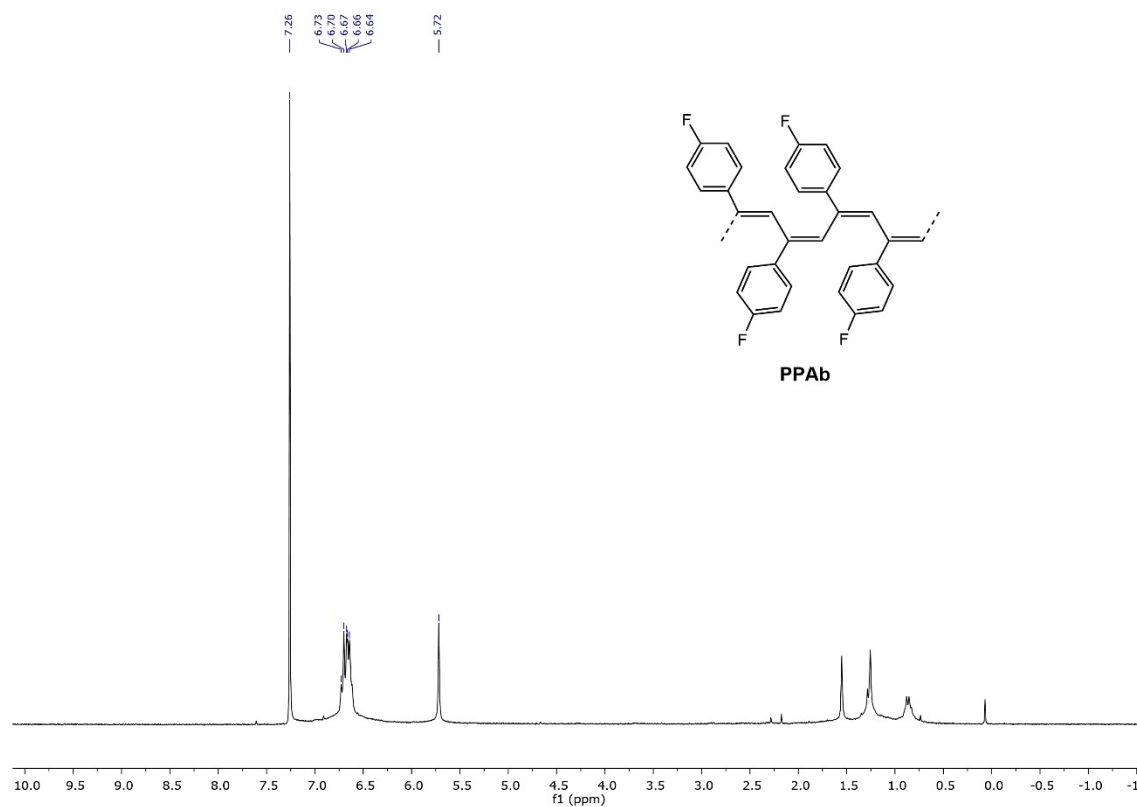

**Figure S4.**  $^1\text{H}$  NMR (300 MHz) spectrum of polymer **PPAb** in  $\text{CDCl}_3$ .

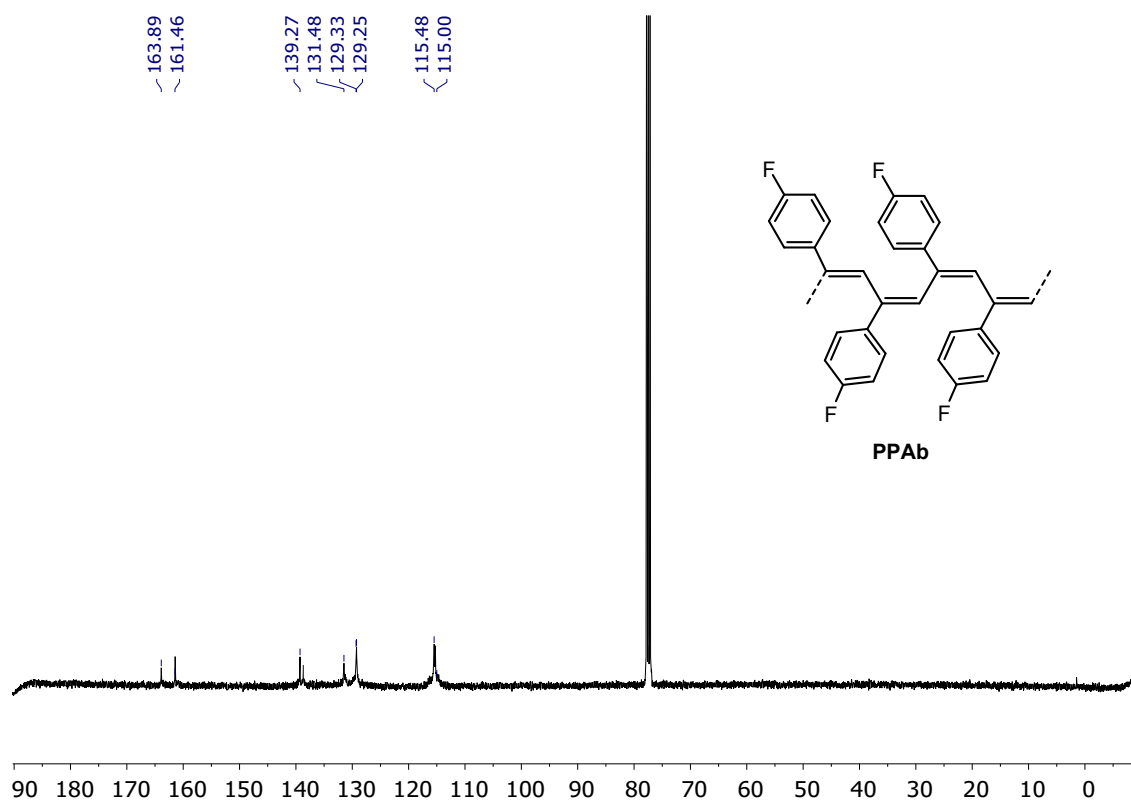

**Figure S5.**  $^{13}\text{C}\{^1\text{H}\}$  NMR (400 MHz) spectrum of polymer **PPAb** in  $\text{CDCl}_3$ .

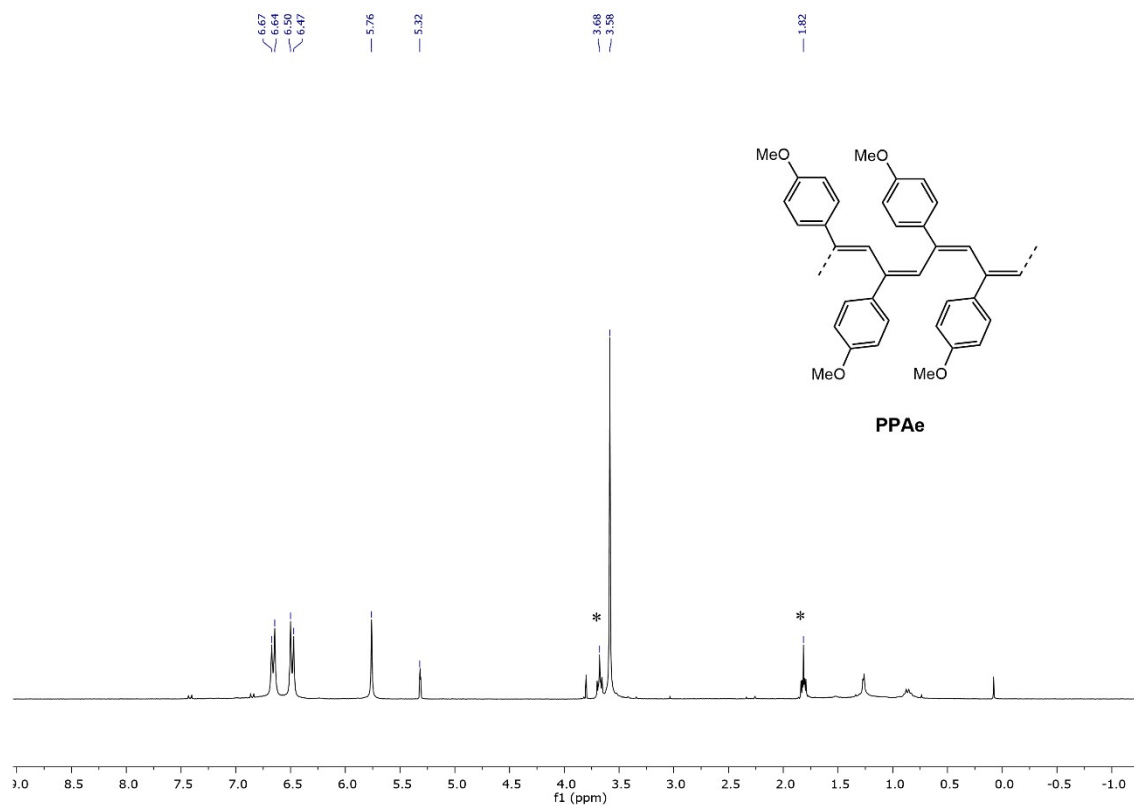

**Figure S6.**  $^1\text{H}$  NMR (400 MHz) spectrum of polymer **PPAe** in  $\text{CD}_2\text{Cl}_2$  (\* THF).

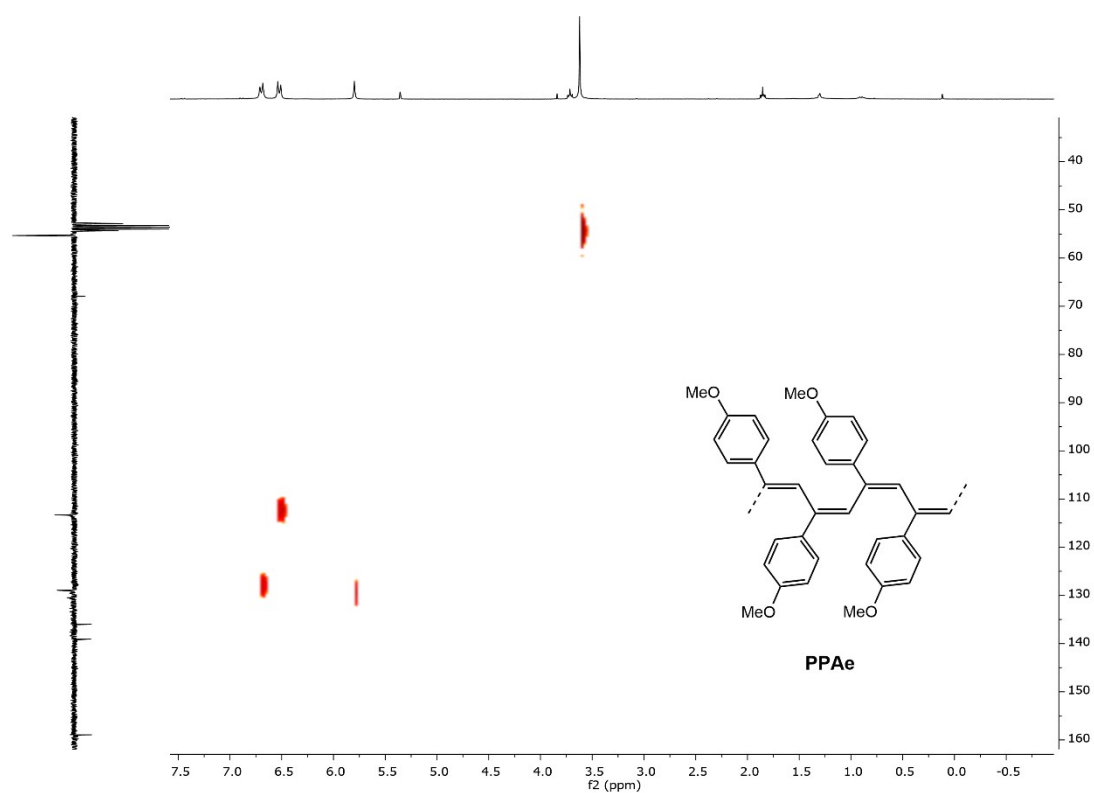

Figure S7.  $^1\text{H}$ - $^{13}\text{C}$ -HSQC (400 MHz) spectrum of polymer **PPAe** in  $\text{CD}_2\text{Cl}_2$ .

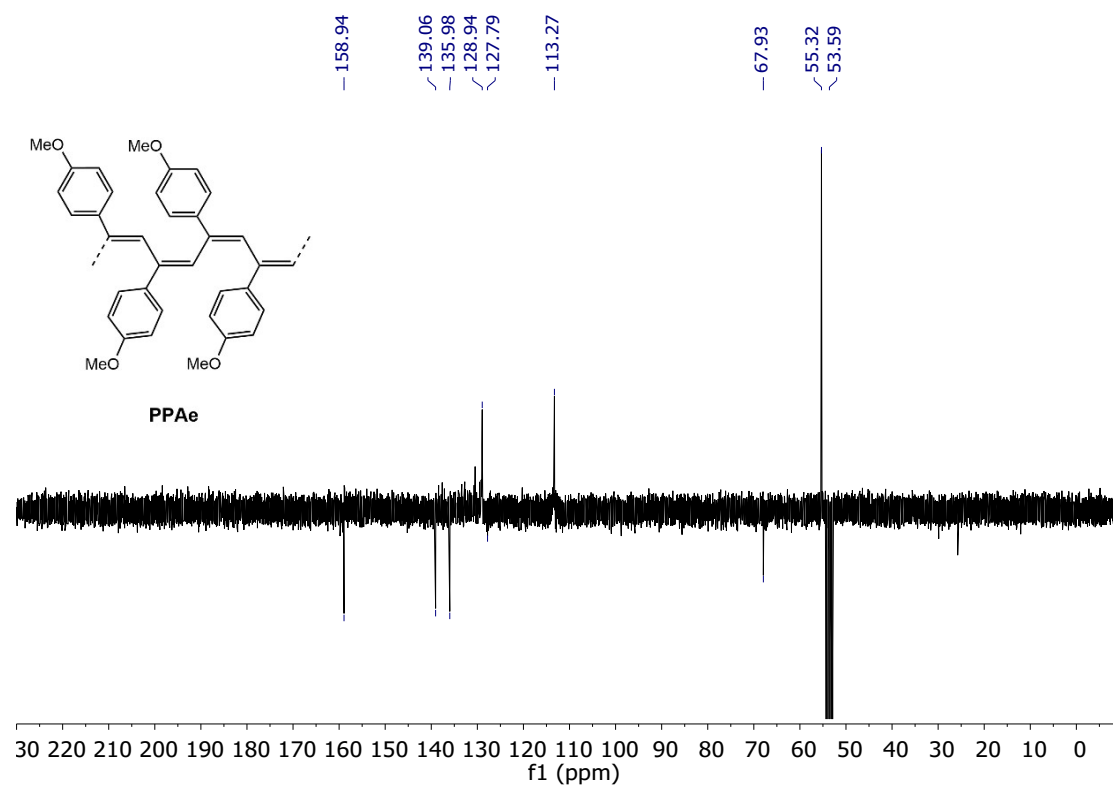

Figure S8.  $^{13}\text{C}\{^1\text{H}\}$ -APT NMR (400 MHz) spectrum of polymer **PPAe** in  $\text{CD}_2\text{Cl}_2$ .

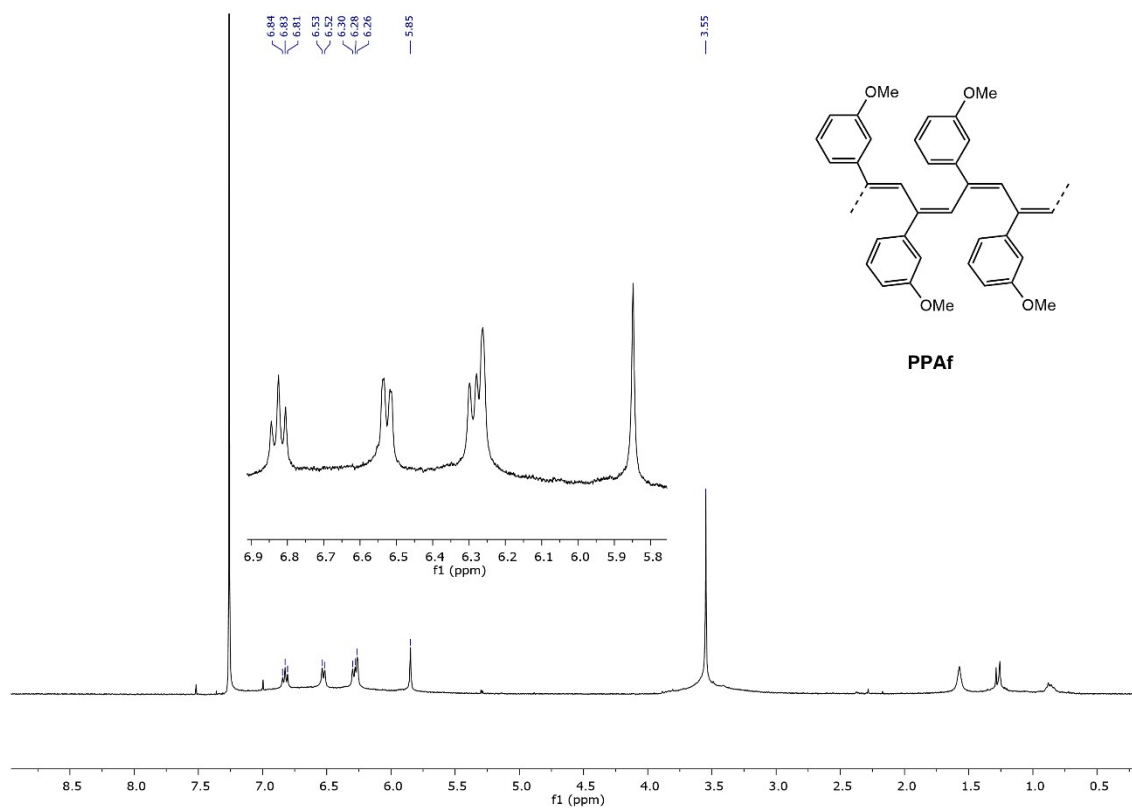

**Figure S9.** <sup>1</sup>H NMR (300 MHz) spectrum of polymer **PPAf** in CDCl<sub>3</sub>.

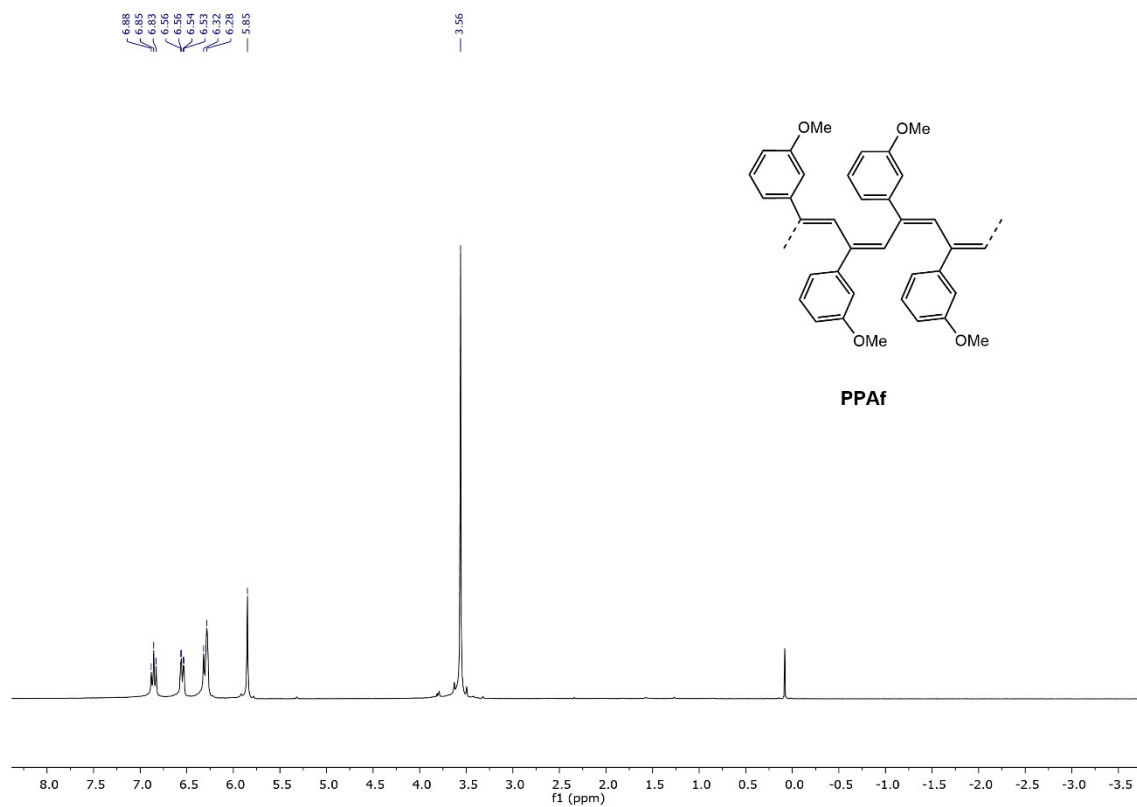

**Figure S10.** <sup>1</sup>H NMR (300 MHz) spectrum of polymer **PPAf** in CD<sub>2</sub>Cl<sub>2</sub>.

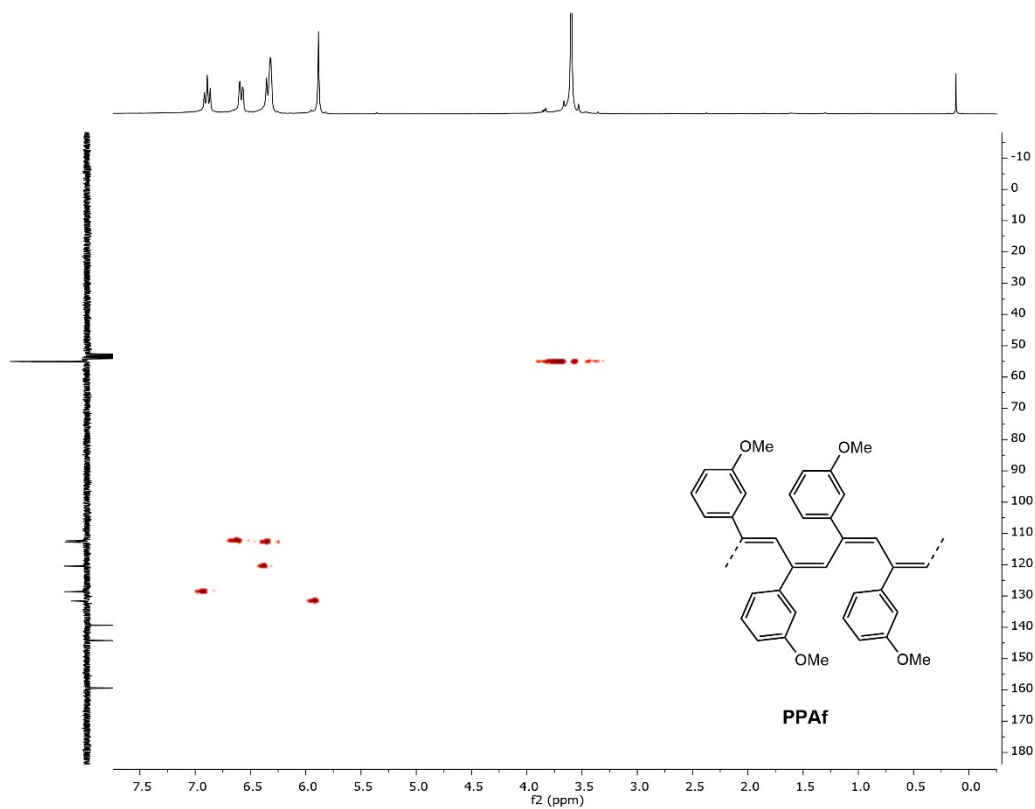

Figure S11.  $^1\text{H}$ - $^{13}\text{C}$ -HSQC (300 MHz) spectrum of polymer **PPAf** in  $\text{CD}_2\text{Cl}_2$ .

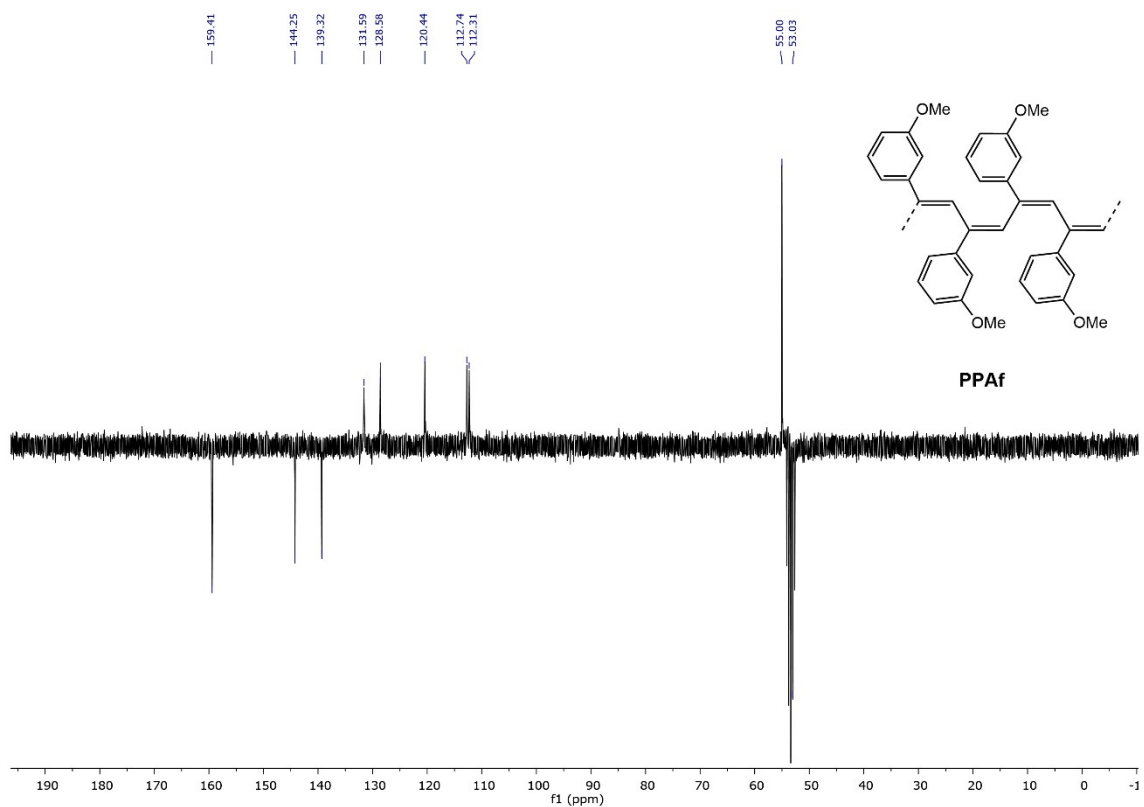

Figure S12.  $^{13}\text{C}\{^1\text{H}\}$ -APT NMR (300 MHz) spectrum of polymer **PPAf** in  $\text{CD}_2\text{Cl}_2$ .

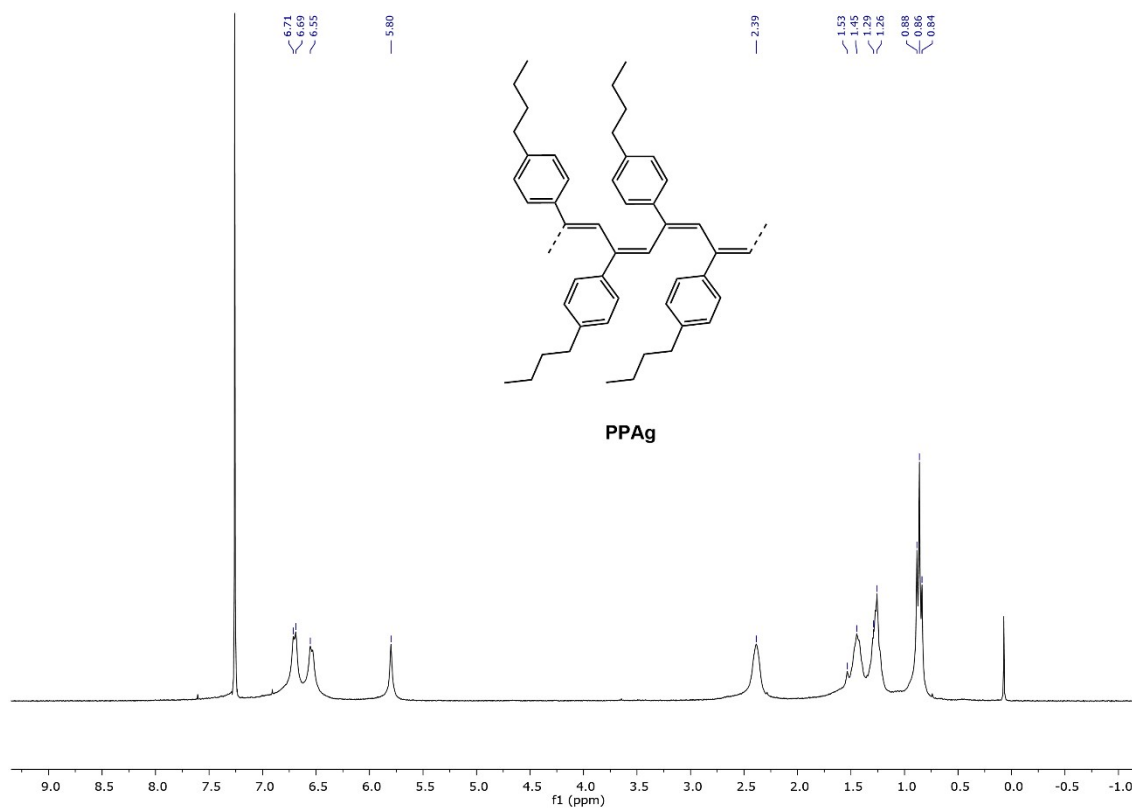

**Figure S13.**  $^1\text{H}$  NMR (300 MHz) spectrum of polymer **PPAg** in  $\text{CDCl}_3$ .

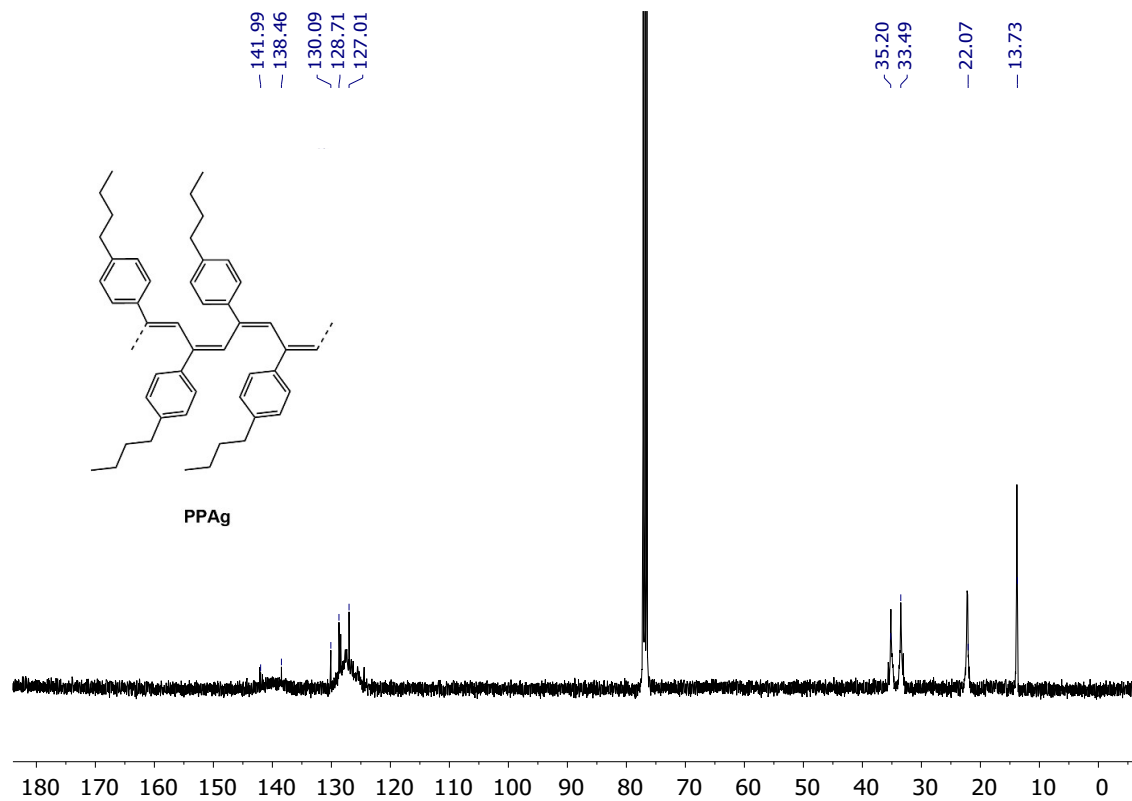

**Figure S14.**  $^{13}\text{C}\{^1\text{H}\}$  NMR (400 MHz) spectrum of polymer **PPAg** in  $\text{CDCl}_3$ .



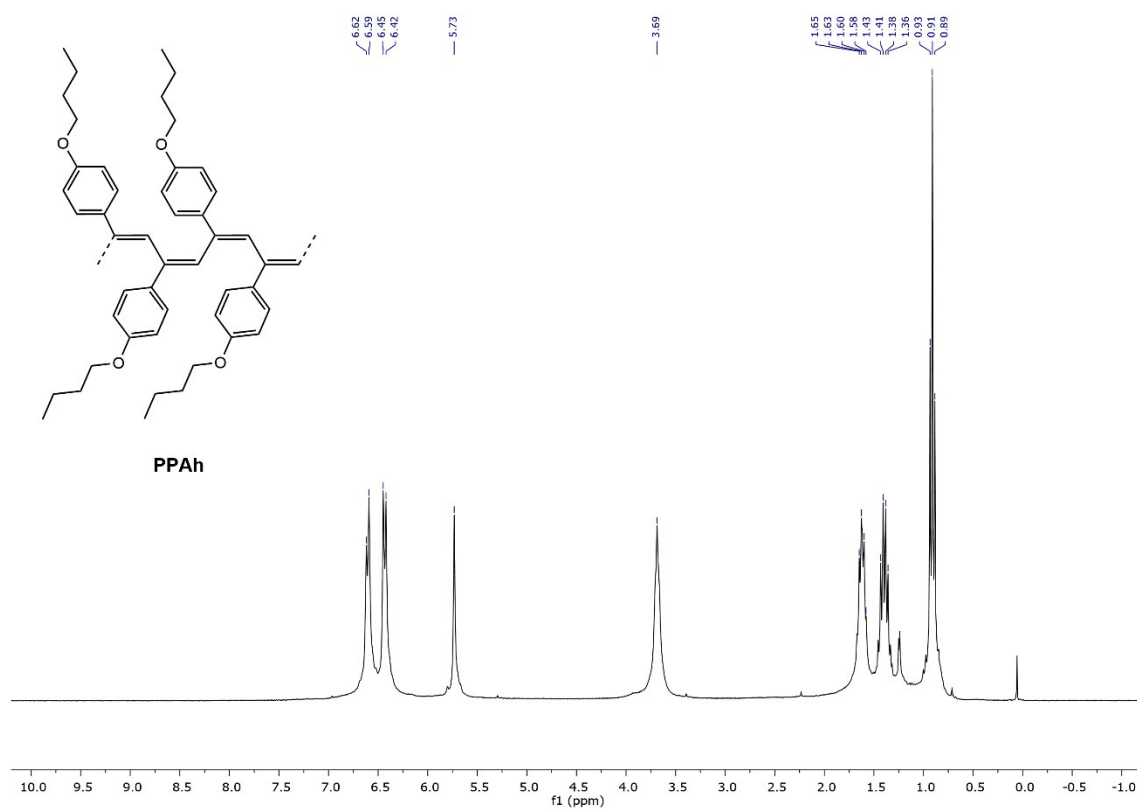

**Figure S15.**  $^1\text{H}$  NMR (300 MHz) spectrum of polymer **PPAh** in  $\text{CD}_2\text{Cl}_2$ .

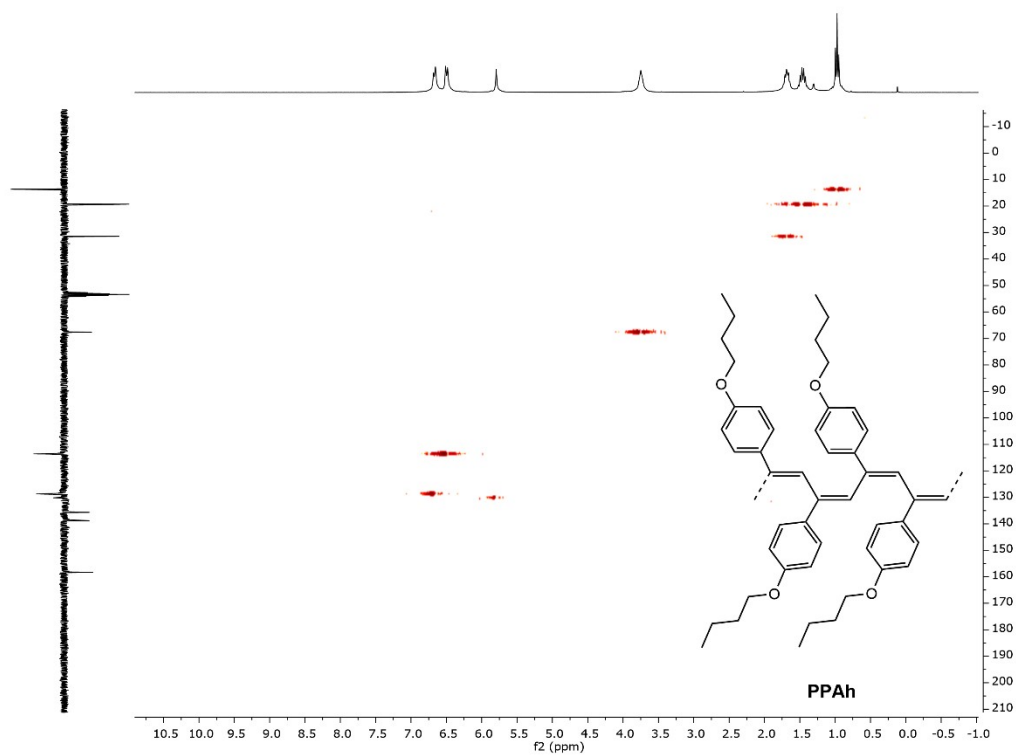

**Figure S16.**  $^1\text{H}$ - $^{13}\text{C}$ -HSQC (300 MHz) spectrum of polymer **PPAh** in  $\text{CD}_2\text{Cl}_2$ .

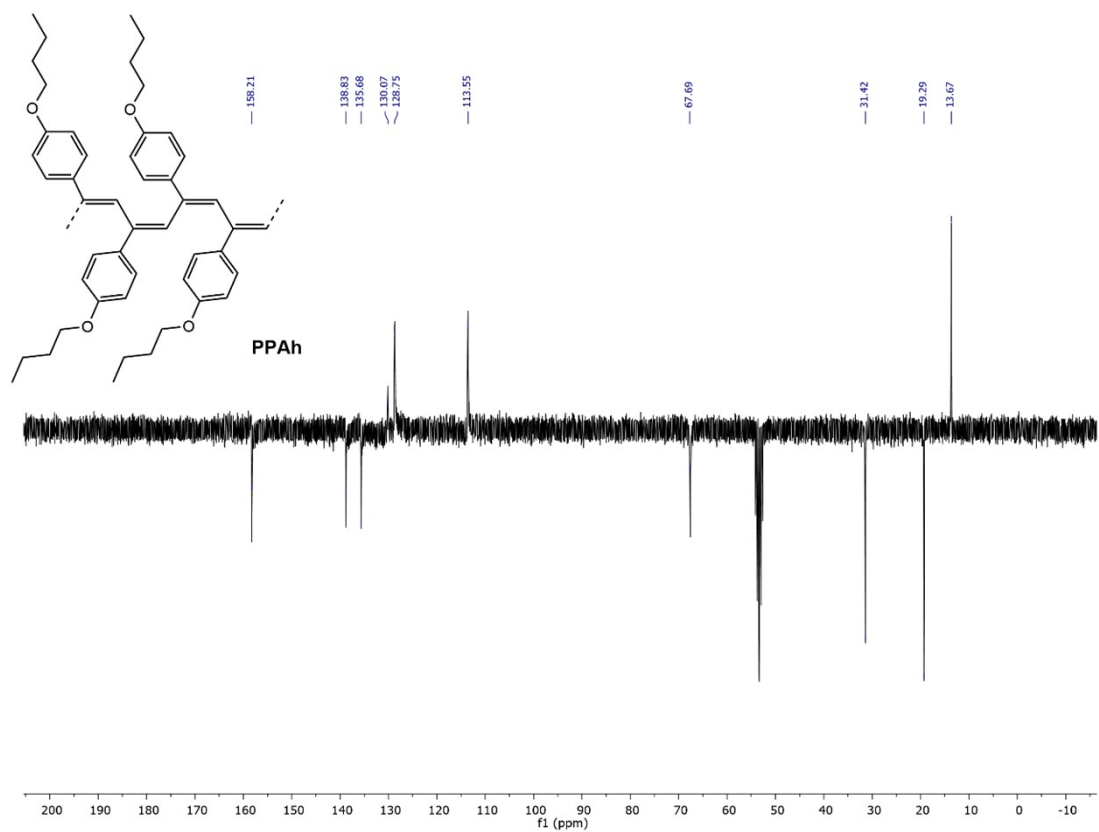

**Figure S17.**  $^{13}\text{C}\{^1\text{H}\}$ -APT NMR (300 MHz) spectrum of polymer **PPAh** in  $\text{CD}_2\text{Cl}_2$ .

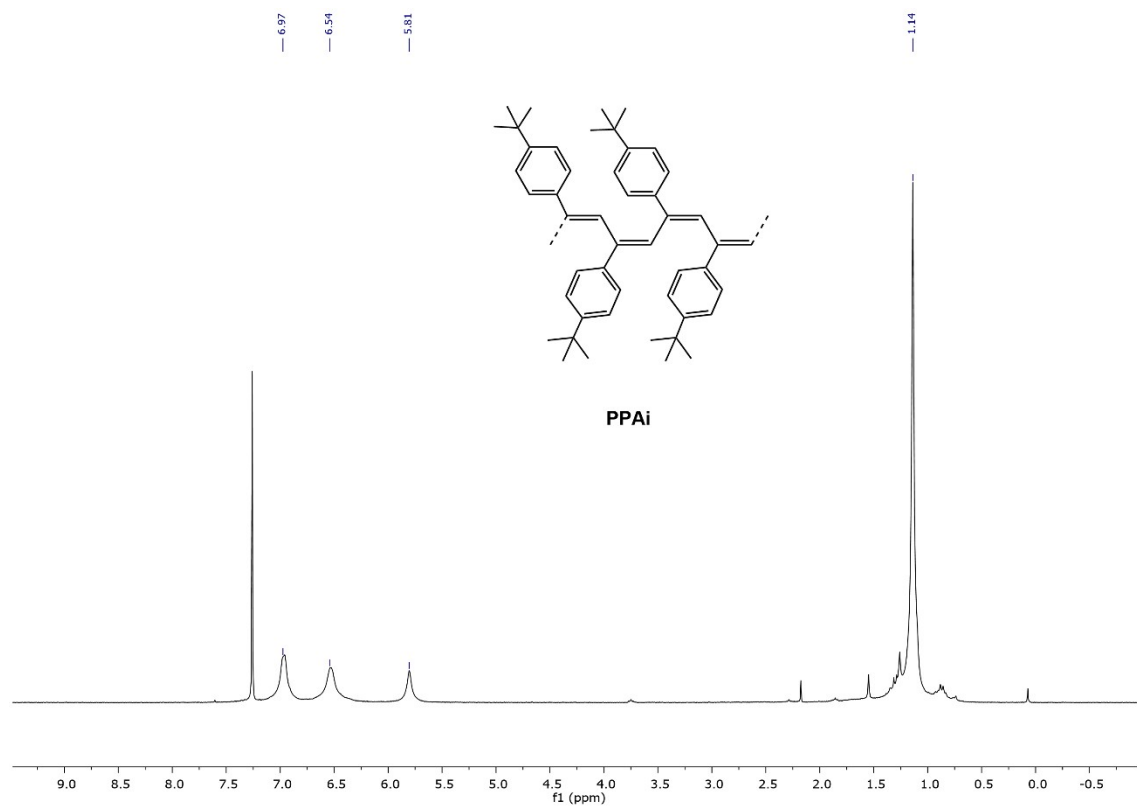

**Figure S18.**  $^1\text{H}$  NMR (300 MHz) spectrum of polymer **PPAi** in  $\text{CDCl}_3$ .

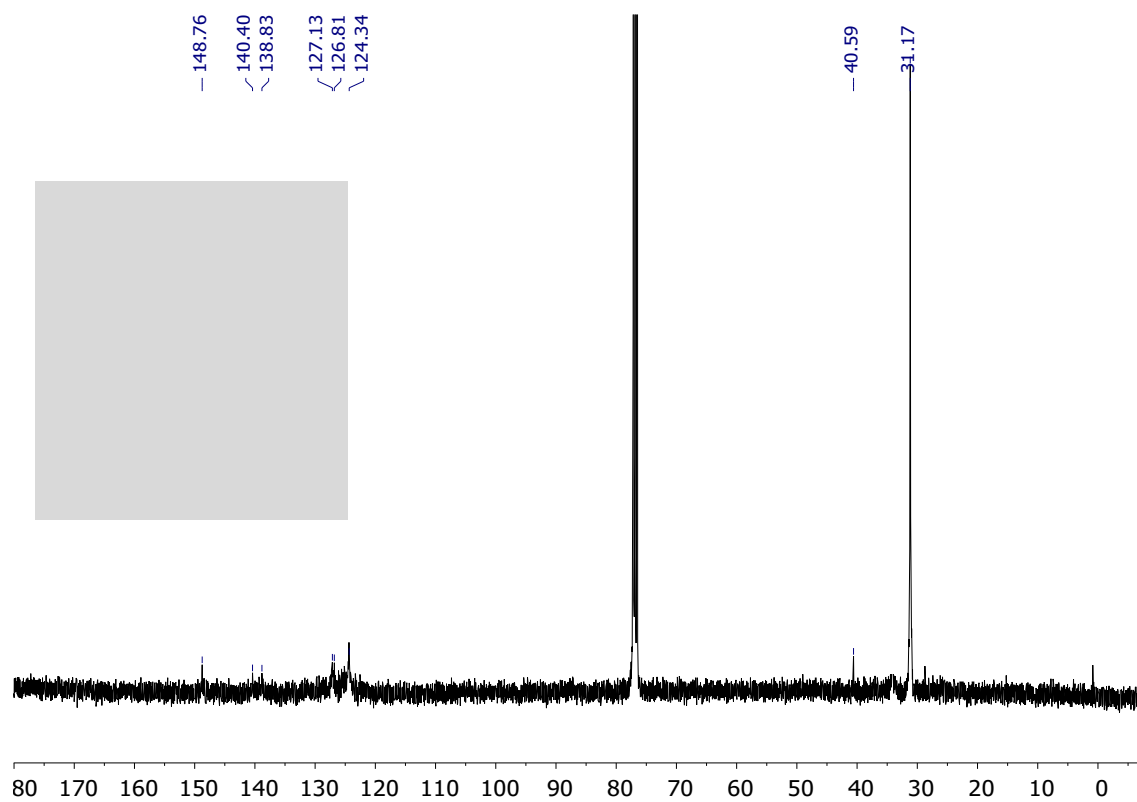

**Figure S19.**  $^{13}\text{C}\{^1\text{H}\}$  NMR (400 MHz) spectrum of polymer PPAi in  $\text{CDCl}_3$ .

## 2.- SEC-MALS chromatograms.

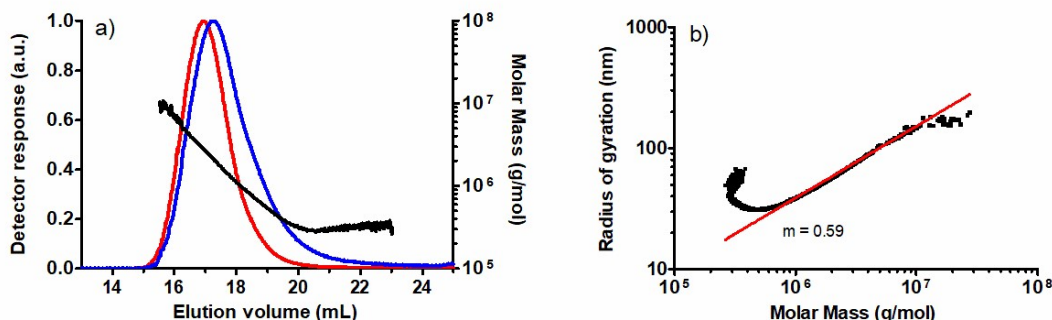

**Figure S20.** (a) SEC chromatograms: light scattering detector response (90 degrees) (red) and differential refractometer response (blue), MM (molar mass) vs. elution volume plot for a **PPAa** sample prepared from **PAa** ( $R = H$ ). (b) Log-log plot of the radius of gyration ( $r_g$ ) vs MM.

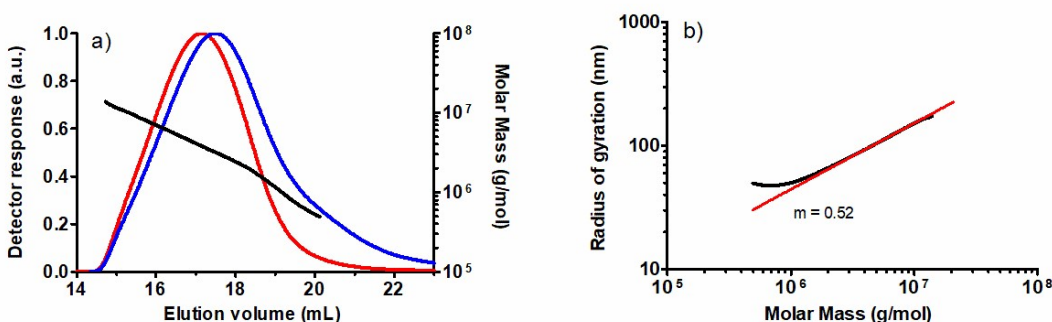

**Figure S21.** (a) SEC chromatograms: light scattering detector response (90 degrees) (red) and differential refractometer response (blue), MM (molar mass) vs. elution volume plot for a **PPAb** sample prepared from **PAb** ( $R = p-F$ ). (b) Log-log plot of the radius of gyration ( $r_g$ ) vs MM.

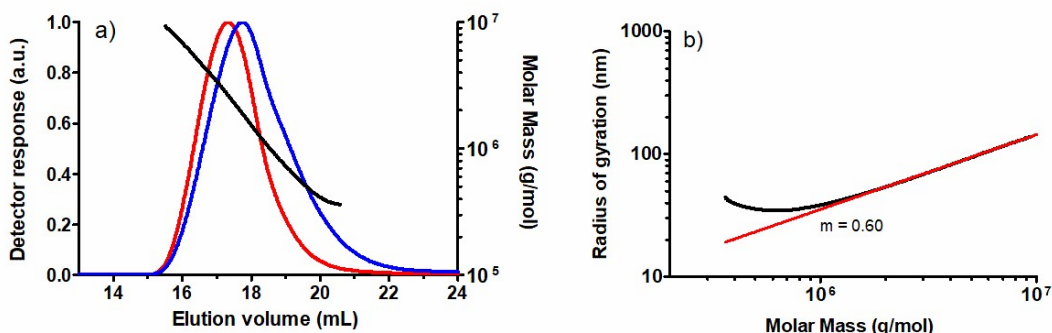

**Figure S22.** (a) SEC chromatograms: light scattering detector response (90 degrees) (red) and differential refractometer response (blue), MM (molar mass) vs. elution volume plot for a **PPAf** sample prepared from **PAf** ( $R = m-OMe$ ). (b) Log-log plot of the radius of gyration ( $r_g$ ) vs MM.

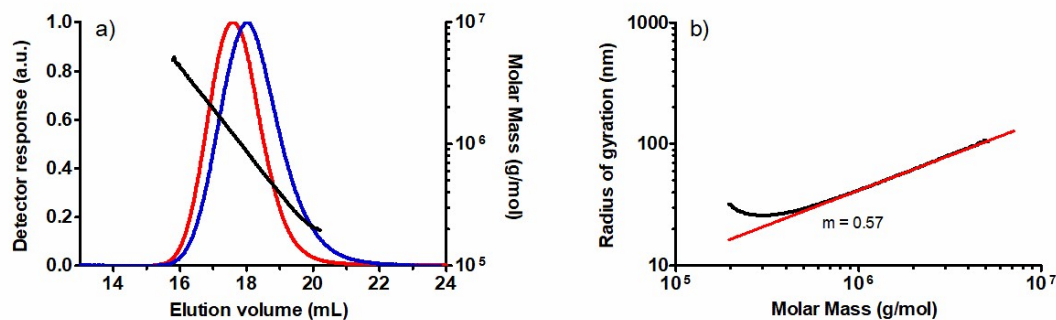

**Figure S23.** (a) SEC chromatograms: light scattering detector response (90 degrees) (red) and differential refractometer response (blue), MM (molar mass) vs. elution volume plot for a **PPAg** sample prepared from **PAG** ( $R = p\text{-Bu}$ ). (b) Log-log plot of the radius of gyration ( $r_g$ ) vs MM.

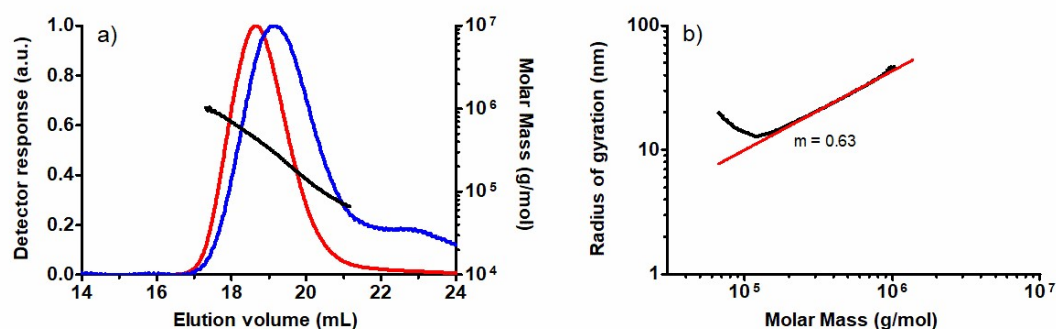

**Figure S24.** (a) SEC chromatograms: light scattering detector response (90 degrees) (red) and differential refractometer response (blue), MM (molar mass) vs. elution volume plot for a **PPAh** sample prepared from **PAh** ( $R = p\text{-OBU}$ ). (b) Log-log plot of the radius of gyration ( $r_g$ ) vs MM.

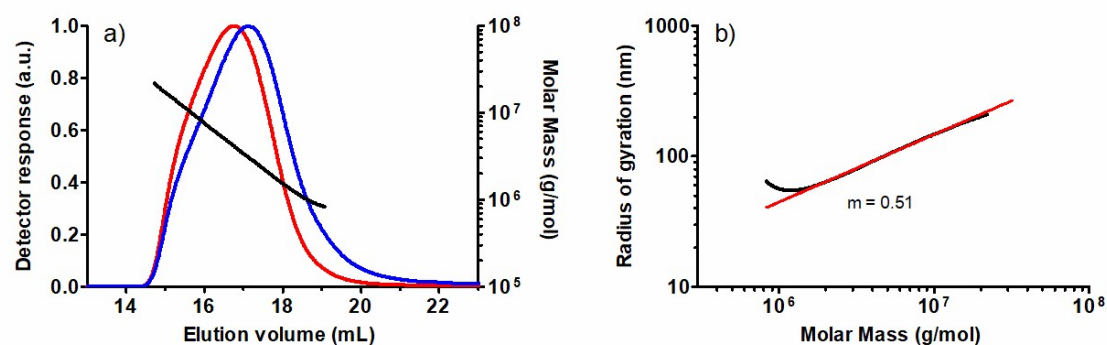

**Figure S25.** (a) SEC chromatograms: light scattering detector response (90 degrees) (red) and differential refractometer response (blue), MM (molar mass) vs. elution volume plot for a **PPAi** sample prepared from **PAi** ( $R = p\text{-tBu}$ ). (b) Log-log plot of the radius of gyration ( $r_g$ ) vs MM.

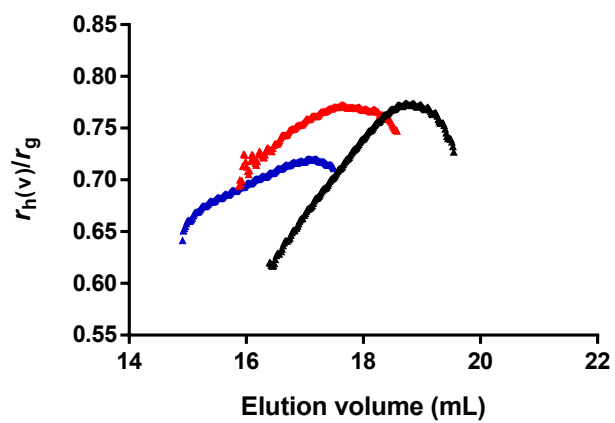

**Figure S26.** Compactness plot,  $r_h(v)/r_g$  ratio vs elution volume, for polymers **PPAa** (R = H, black), **PPAg** (R = *p*-Bu, red) and **PPAi** (R = *p*-<sup>t</sup>Bu, blue).

### 3.- Kinetic data.

**PAa (R = H)**

| t (min) | Conv (%) | t (min) | [PA]  | [PA] <sub>0</sub> /[PA] | Ln([PA] <sub>0</sub> /[PA]) |
|---------|----------|---------|-------|-------------------------|-----------------------------|
| 0       | 0,0      | 0       | 0,250 | 1,000                   | 0,000                       |
| 1       | 43,6     | 1       | 0,141 | 1,774                   | 0,573                       |
| 3       | 52,3     | 3       | 0,119 | 2,096                   | 0,740                       |
| 5       | 61,0     | 5       | 0,098 | 2,563                   | 0,941                       |
| 7       | 65,3     | 7       | 0,087 | 2,882                   | 1,058                       |
| 9       | 72,0     | 9       | 0,070 | 3,565                   | 1,271                       |
| 11      | 77,2     | 11      | 0,057 | 4,380                   | 1,477                       |
| 15      | 84,5     | 15      | 0,039 | 6,439                   | 1,862                       |
| 25      | 90,7     |         |       |                         |                             |
| 35      | 92,8     |         |       |                         |                             |
| 42      | 94,9     |         |       |                         |                             |
| 47      | 96,3     |         |       |                         |                             |
| 60      | 100,0    |         |       |                         |                             |

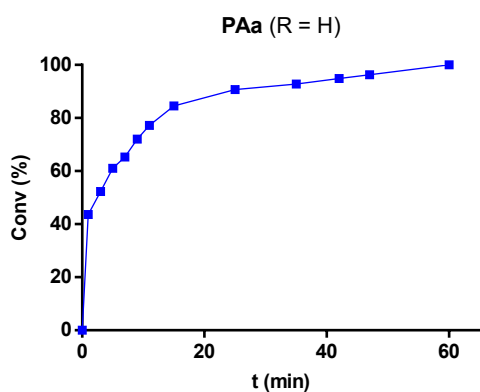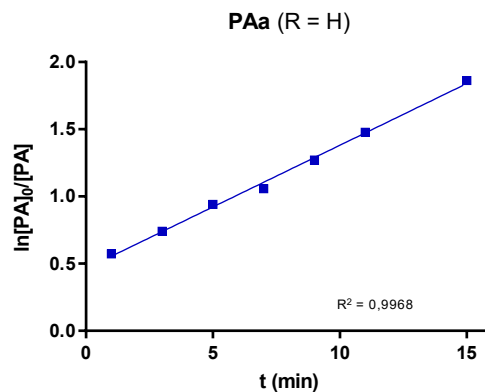

**PAb (R = p-F)**

| t (min) | Conv (%) | t (min) | [PA]  | [PA] <sub>0</sub> /[PA] | Ln([PA] <sub>0</sub> /[PA]) |
|---------|----------|---------|-------|-------------------------|-----------------------------|
| 0       | 0,0      | 0       | 0,250 | 1,000                   | 0,000                       |
| 3       | 37,9     | 3       | 0,155 | 1,611                   | 0,477                       |
| 5       | 60,9     | 5       | 0,098 | 2,557                   | 0,939                       |
| 8       | 77,0     | 8       | 0,057 | 4,349                   | 1,470                       |
| 10      | 84,8     | 10      | 0,038 | 6,593                   | 1,886                       |
| 15      | 91,4     | 15      | 0,021 | 11,647                  | 2,455                       |
| 25      | 93,0     |         |       |                         |                             |

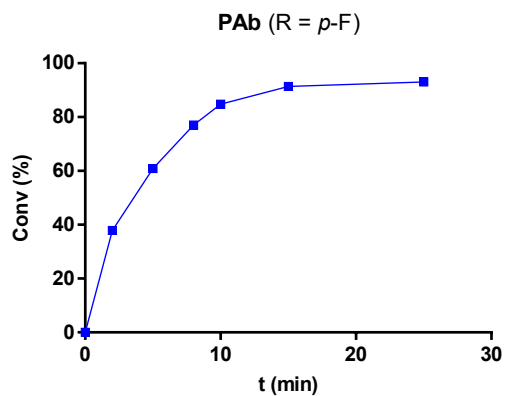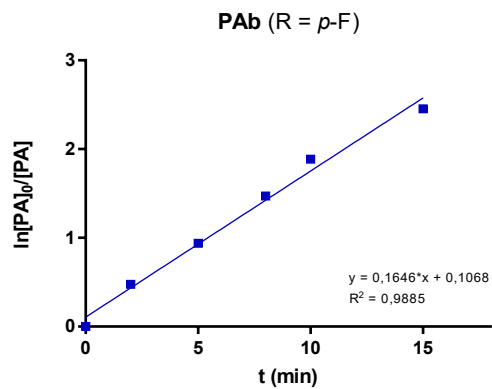

**PAc (R = p-Me)**

| t (min) | Conv (%) | t (min) | [PA]  | [PA]₀/[PA] | Ln([PA]₀/[PA]) |
|---------|----------|---------|-------|------------|----------------|
| 0       | 0,0      | 0       | 0,250 | 1,000      | 0,000          |
| 4       | 33,2     | 4       | 0,174 | 1,433      | 0,360          |
| 8       | 55,6     | 8       | 0,119 | 2,109      | 0,746          |
| 12      | 66,3     | 12      | 0,092 | 2,724      | 1,002          |
| 20      | 76,6     | 20      | 0,058 | 4,276      | 1,453          |
| 27      | 83,7     | 27      | 0,041 | 6,145      | 1,816          |
| 40      | 91,2     | 40      | 0,022 | 11,389     | 2,433          |
| 60      | 97,3     | 60      | 0,007 | 36,610     | 3,600          |

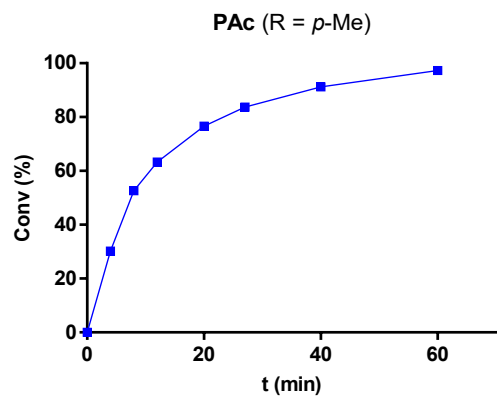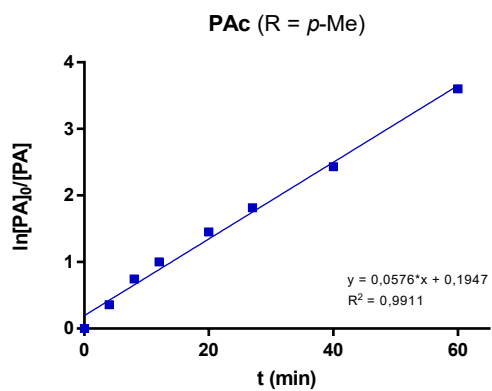



**PAd** (R = *p*-CF<sub>3</sub>)

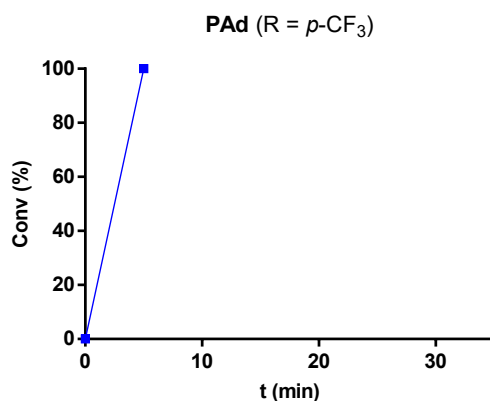

**PAe** (R = *p*-OMe)

| t (min) | Conv (%) | t (min) | [PA]  | [PA] <sub>0</sub> /[PA] | Ln([PA] <sub>0</sub> /[PA]) |
|---------|----------|---------|-------|-------------------------|-----------------------------|
| 0       | 0,0      | 0       | 0,250 | 1,000                   | 0,000                       |
| 2       | 3,9      | 2       | 0,245 | 1,020                   | 0,040                       |
| 4       | 18,0     | 4       | 0,240 | 1,042                   | 0,198                       |
| 7       | 32,6     | 7       | 0,233 | 1,075                   | 0,395                       |
| 10      | 48,2     | 10      | 0,225 | 1,111                   | 0,658                       |
| 15      | 61,2     | 15      | 0,213 | 1,176                   | 0,947                       |
| 20      | 70,6     | 20      | 0,200 | 1,250                   | 1,226                       |
| 35      | 91,5     | 35      | 0,163 | 1,538                   | 2,470                       |
| 45      | 95,8     | 45      | 0,138 | 1,818                   | 3,167                       |
| 60      | 99,0     | 60      | 0,100 | 2,500                   | 4,629                       |

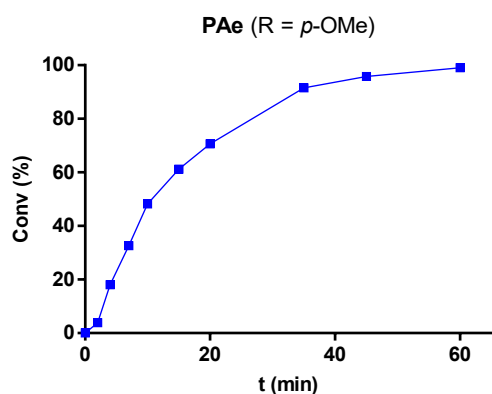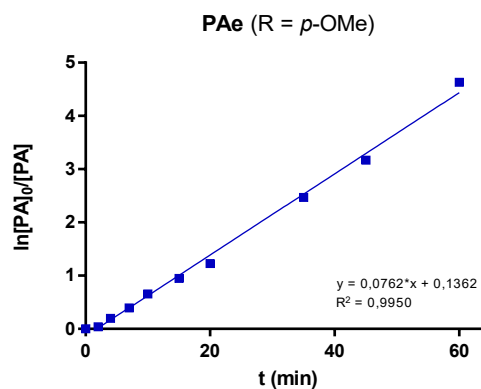

**PAf (R = *m*-OMe)**

| t (min) | Conv (%) | t (min) | [PA]  | [PA] <sub>0</sub> /[PA] | Ln([PA] <sub>0</sub> /[PA]) |
|---------|----------|---------|-------|-------------------------|-----------------------------|
| 0       | 0,0      | 0       | 0,250 | 1,000                   | 0,000                       |
| 2       | 5,5      | 2       | 0,236 | 1,058                   | 0,056                       |
| 5       | 17,2     | 5       | 0,207 | 1,208                   | 0,189                       |
| 10      | 33,7     | 10      | 0,166 | 1,508                   | 0,411                       |
| 15      | 44,6     | 15      | 0,139 | 1,804                   | 0,590                       |
| 25      | 65,2     | 25      | 0,087 | 2,871                   | 1,055                       |
| 35      | 79,7     | 35      | 0,051 | 4,915                   | 1,592                       |
| 55      | 93,0     | 55      | 0,018 | 14,228                  | 2,655                       |
| 75      | 97,7     | 75      | 0,006 | 43,842                  | 3,781                       |

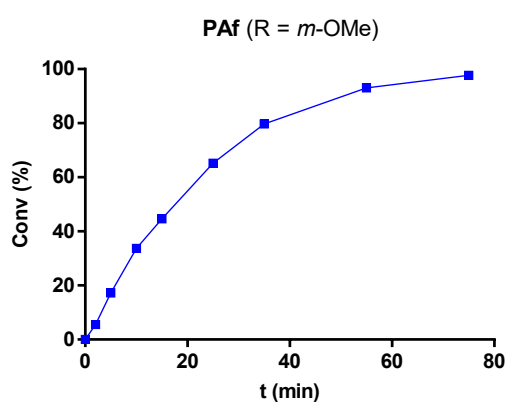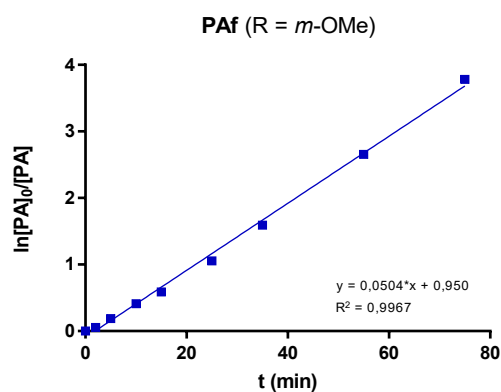

**PAg (R = *p*-Bu)**

| t (min) | Conv (%) | t (min) | [PA]  | [PA] <sub>0</sub> /[PA] | Ln([PA] <sub>0</sub> /[PA]) |
|---------|----------|---------|-------|-------------------------|-----------------------------|
| 0       | 0,0      | 0       | 0,250 | 1,000                   | 0,000                       |
| 12      | 25,6     | 12      | 0,186 | 1,343                   | 0,295                       |
| 15      | 31,1     | 15      | 0,172 | 1,452                   | 0,373                       |
| 20      | 39,8     | 20      | 0,150 | 1,661                   | 0,508                       |
| 26      | 52,4     | 26      | 0,119 | 2,102                   | 0,743                       |
| 30      | 57,4     | 30      | 0,107 | 2,347                   | 0,853                       |
| 45      | 72,3     | 45      | 0,069 | 3,605                   | 1,282                       |
| 75      | 88,0     | 75      | 0,030 | 8,357                   | 2,123                       |
| 95      | 100,0    |         |       |                         |                             |

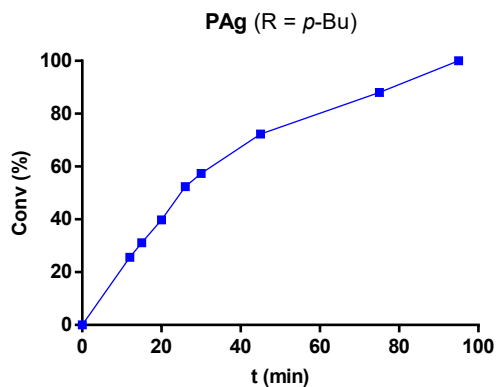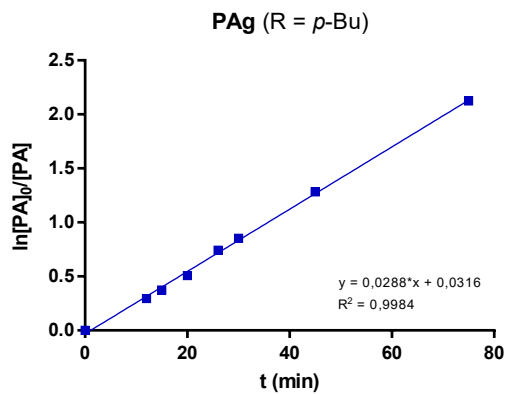

**PAh (R = *p*-OBu)**

| t (min) | Conv (%) | t (min) | [PA]  | [PA]₀/[PA] | Ln([PA]₀/[PA]) |
|---------|----------|---------|-------|------------|----------------|
| 0       | 0,0      | 0       | 0,250 | 1,000      | 0,000          |
| 15      | 16,3     | 15      | 0,209 | 1,195      | 0,178          |
| 30      | 30,9     | 30      | 0,173 | 1,447      | 0,369          |
| 60      | 44,0     | 60      | 0,140 | 1,787      | 0,581          |
| 90      | 55,0     | 90      | 0,112 | 2,224      | 0,799          |
| 120     | 62,9     | 120     | 0,093 | 2,694      | 0,991          |
| 180     | 77,9     | 180     | 0,055 | 4,523      | 1,509          |
| 240     | 85,2     | 240     | 0,037 | 6,736      | 1,908          |

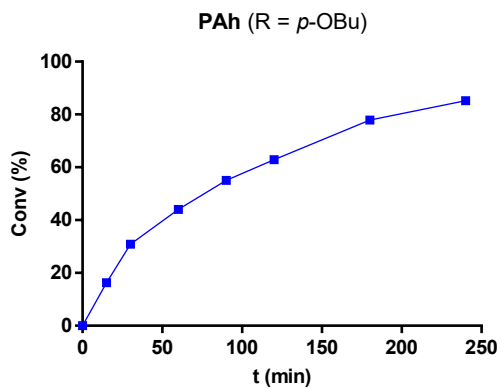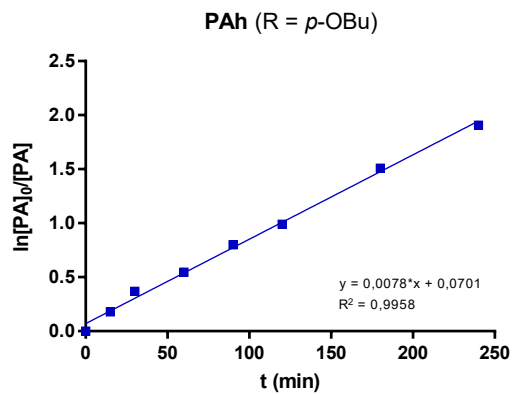

**PAi (R = *p*-<sup>t</sup>Bu)**

| t (min) | Conv (%) |  | t (min) | [PA]  | [PA] <sub>0</sub> /[PA] | Ln([PA] <sub>0</sub> /[PA]) |
|---------|----------|--|---------|-------|-------------------------|-----------------------------|
| 0       | 0,0      |  | 0       | 0,250 | 1,000                   | 0,000                       |
| 3       | 52,9     |  | 3       | 0,118 | 2,121                   | 0,752                       |
| 5       | 70,0     |  | 5       | 0,075 | 3,333                   | 1,204                       |
| 6       | 77,3     |  | 6       | 0,057 | 4,400                   | 1,482                       |
| 8       | 87,3     |  | 8       | 0,032 | 7,888                   | 2,065                       |
| 10      | 90,9     |  | 10      | 0,023 | 10,937                  | 2,392                       |
| 14      | 94,9     |  | 14      | 0,013 | 19,663                  | 2,979                       |
| 17      | 95,7     |  |         |       |                         |                             |
| 20      | 96,6     |  |         |       |                         |                             |
| 24      | 98,1     |  |         |       |                         |                             |
| 28      | 98,8     |  |         |       |                         |                             |
| 30      | 99,8     |  |         |       |                         |                             |

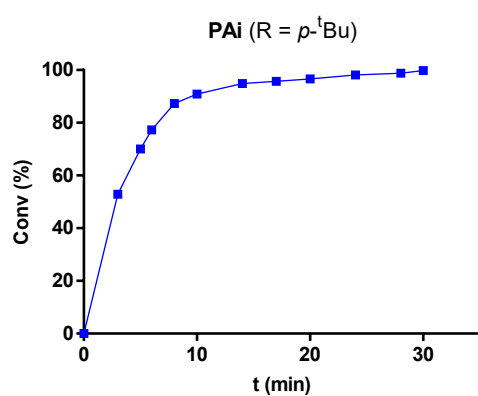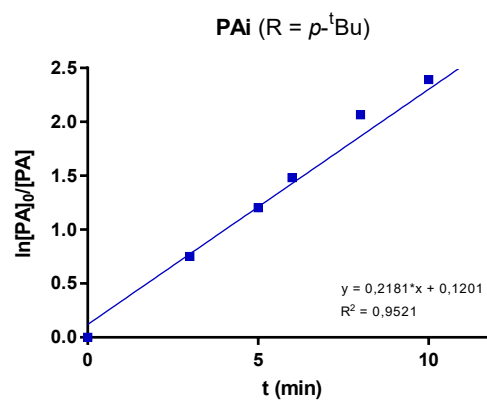

#### 4.- Selected DSC thermograms.

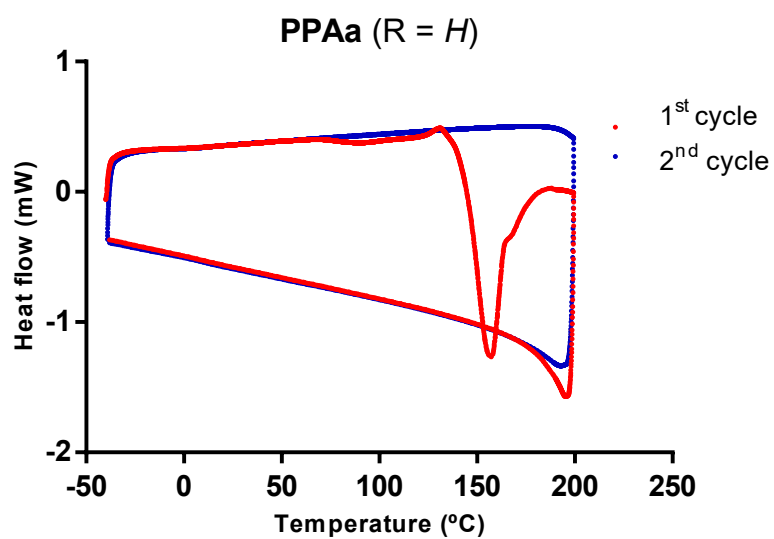

**Figure S27.** DSC thermogram of polymer PPAa.

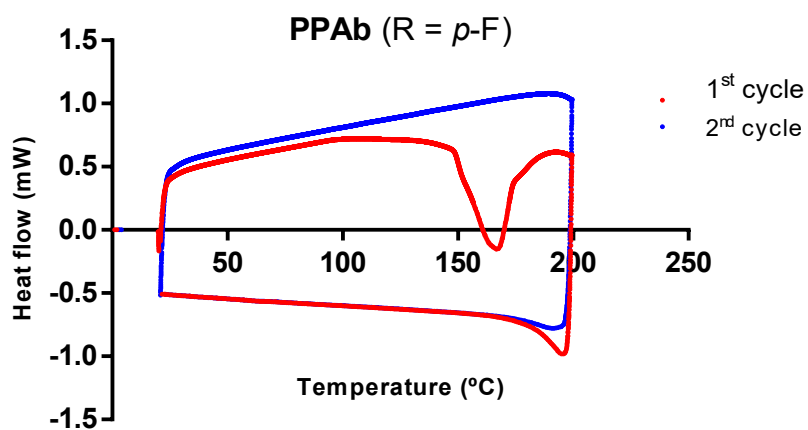

**Figure S28.** DSC thermogram of polymer PPAb.

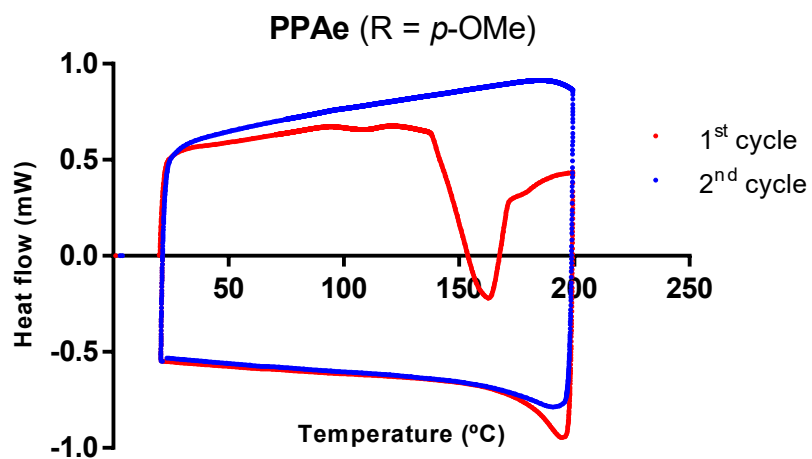

**Figure S29.** DSC thermogram of polymer PPAe.

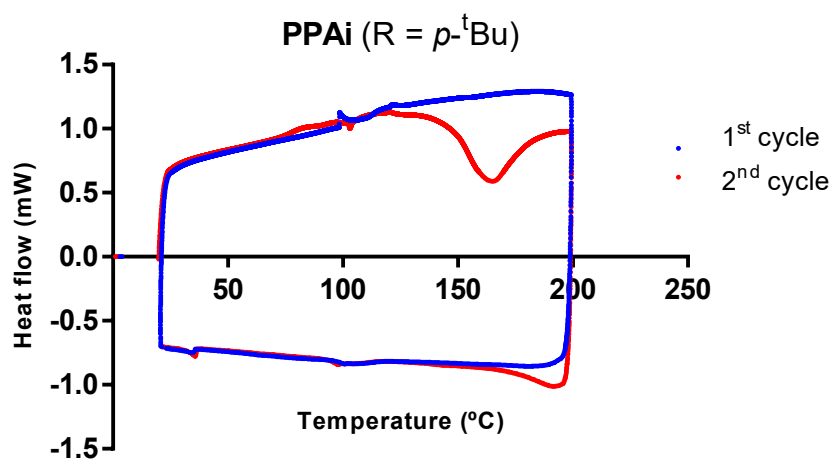

**Figure S30.** DSC thermogram of polymer PPAi.

## 5.- Thermal degradation of polymer PP Ae (R = *p*-OMe).

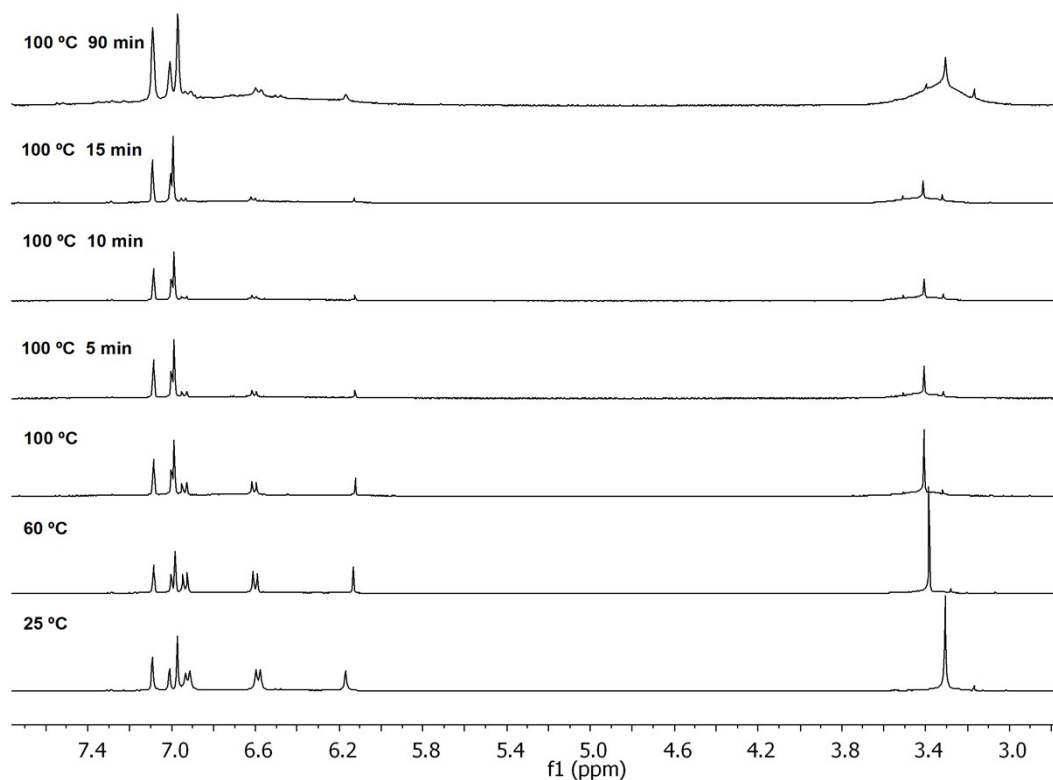

**Figure S31.** <sup>1</sup>H NMR monitoring of a solution of PP Ae (R = *p*-OMe) in toluene-*d*<sub>8</sub> at different temperatures.

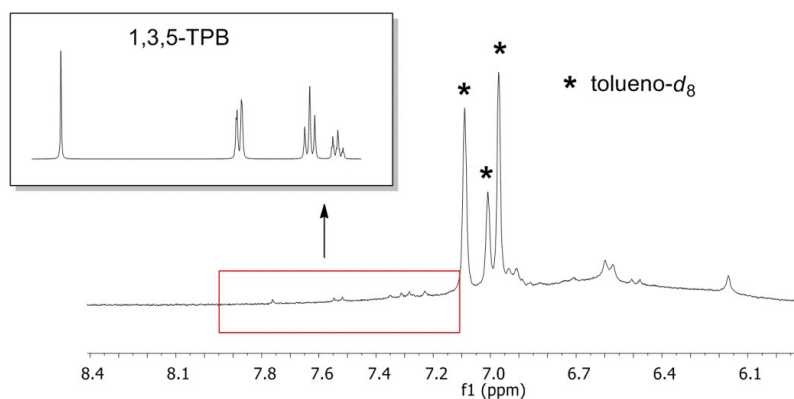

**Figure 32.** Aromatic region of the <sup>1</sup>H NMR spectrum of a solution of PP Ae (R = *p*-OMe) in toluene-*d*<sub>8</sub> after heating at 100 °C for 90 min showing the formation of 1,3,5-triphenylbenzene (1,3,5-TPB).
